# Supplementary material for: Ustekinumab is effective for perianal fistulising Crohn's disease: a real-world experience and systematic review with meta-analysis
Source: PubMed Central journal article supplement — BMJ Open Gastroenterol. 2021 Dec 17;8(1):e000702. doi: 10.1136/bmjgast-2021-000702 (PMC8685938; doi:10.1136/bmjgast-2021-000702), 2021-12-17
Supplement: bmjgast-2021-000702supp001.pdf [file bmjgast-2021-000702supp001.pdf]

**Supplementary Material. Gala M. Godoy Brewer. USTEKINUMAB IS EFFECTIVE FOR PERIANAL FISTULIZING CROHN'S DISEASE: A REAL-WORLD EXPERIENCE AND SYSTEMATIC REVIEW WITH META-ANALYSIS**

**Supplementary Table 1. Multivariable analysis of factors associated with fistula response to ustekinumab at 6 months.**

|                         |           | OR (response) | 95% CI | P    |
|-------------------------|-----------|---------------|--------|------|
| <b>Male</b>             |           | 1.52          | 0.29   | 0.58 |
|                         |           |               | 8.51   |      |
| <b>Race</b>             | Caucasian | ref           |        |      |
|                         | African   | 0.54          | 0.07   | 0.46 |
|                         | American  |               | 3.23   |      |
|                         | Other     | 0.88          | 0.07   | 0.90 |
|                         |           |               | 10.40  |      |
| <b>Smoking status</b>   | Never     | ref           |        |      |
|                         | Current   | 2.33          | 0.15   | 0.46 |
|                         |           |               | 83.62  |      |
|                         | Former    | 1.27          | 0.21   | 0.77 |
|                         |           |               | 7.66   |      |
| <b>Age at induction</b> |           | 1.18          | 0.24   | 0.81 |
|                         |           |               | 5.97   |      |

|                                   |      |       |      |
|-----------------------------------|------|-------|------|
| <b>Disease duration</b>           | 2.49 | 0.49  | 0.23 |
|                                   |      | 14.11 |      |
| <b>Prior IBD surgery</b>          | 0.48 | 0.09  | 0.33 |
|                                   |      | 2.29  |      |
| <b># prior biologics</b>          | 0.56 | 0.08  | 0.47 |
|                                   |      | 3.10  |      |
| <b>Concurrent immunomodulator</b> | 2.95 | 0.55  | 0.23 |
|                                   |      | 19.16 |      |
| <b>Dose escalation</b>            | 1.53 | 0.21  | 0.67 |
|                                   |      | 14.97 |      |

Supplementary Table 2. Adverse events

| Adverse event        | Number of patients | Percentage | Type of adverse event                                            |
|----------------------|--------------------|------------|------------------------------------------------------------------|
| Infections           | 6                  | 22         | Perianal abscess , abdominal abscess and sepsis, sinus infection |
| Infusion reactions   | 2                  | 7.4        | Flushing and redness, numbness and tingling                      |
| Other adverse events | 6                  | 22         | Chronic fevers, hypereosinophilia                                |

|  |  |  |                                                                                                                                                          |
|--|--|--|----------------------------------------------------------------------------------------------------------------------------------------------------------|
|  |  |  | with hypereosinophilic gastro-esophagitis, flare of hemolytic uremic syndrome, headache, nausea and shortness of breath, bloating, vomiting and fatigue. |
|--|--|--|----------------------------------------------------------------------------------------------------------------------------------------------------------|

**Supplementary Table 3. Quality assessment performed using the New-Castle Ottawa Scale (NOS)**

| Study ID        | Representativeness of exposed cohort (Maximum: ★) | Selection of non-exposed cohort (Maximum: ★) | Ascertainment of exposure (maximum: ★) | Outcome of interest was not present at start of study (Maximum: ★) | Comparability of cohorts on the basis of design or analysis (Maximum: ★★) | Assessment of outcomes (Maximum: ★) | Follow-up period long enough for outcome to occur (Maximum: ★) | Adequacy of follow-up period among cohorts (Maximum: ★) | Quality Score (TOTAL SCORE= 9) |
|-----------------|---------------------------------------------------|----------------------------------------------|----------------------------------------|--------------------------------------------------------------------|---------------------------------------------------------------------------|-------------------------------------|----------------------------------------------------------------|---------------------------------------------------------|--------------------------------|
| HARRIS 2019     | ★                                                 | –                                            | ★                                      | ★                                                                  | --                                                                        | ★                                   | ★                                                              | ★                                                       | ★★★★★<br>★                     |
| WEAVER 2019     | ★                                                 | –                                            | ★                                      | ★                                                                  | --                                                                        | ★                                   | ★                                                              | --                                                      | ★★★★★                          |
| CHAVANNES 2019  | ★                                                 | --                                           | ★                                      | ★                                                                  | --                                                                        | ★                                   | ★                                                              | ★                                                       | ★★★★★<br>★                     |
| KRUGLIAK 2018   | ★                                                 | –                                            | ★                                      | ★                                                                  | --                                                                        | ★                                   | ★                                                              | ★                                                       | ★★★★★<br>★                     |
| SATYAM 2018     | ★                                                 | –                                            | ★                                      | ★                                                                  | --                                                                        | ★                                   | ★                                                              | ★                                                       | ★★★★★<br>★                     |
| BATTAT 2017     | ★                                                 | –                                            | ★                                      | ★                                                                  | --                                                                        | ★                                   | ★                                                              | ★                                                       | ★★★★★<br>★                     |
| TSISTRAKIS 2017 | ★                                                 | –                                            | ★                                      | ★                                                                  | --                                                                        | ★                                   | ★                                                              | ★                                                       | ★★★★★<br>★                     |
| MA 2017         | ★                                                 | –                                            | ★                                      | ★                                                                  | --                                                                        | ★                                   | ★                                                              | ★                                                       | ★★★★★<br>★                     |
| KHORRAMI 2016   | ★                                                 | –                                            | ★                                      | ★                                                                  | --                                                                        | ★                                   | ★                                                              | ★                                                       | ★★★★★<br>★                     |
| BISHOP 2016     | ★                                                 | –                                            | ★                                      | ★                                                                  | --                                                                        | ★                                   | ★                                                              | ★                                                       | ★★★★★<br>★                     |
| WILS 2016       | ★                                                 | –                                            | ★                                      | ★                                                                  | --                                                                        | ★                                   | ★                                                              | ★                                                       | ★★★★★<br>★                     |

|                        |   |    |   |   |    |   |   |    |            |
|------------------------|---|----|---|---|----|---|---|----|------------|
| KOPYLOV<br>2015        | ★ | -- | ★ | ★ | -- | ★ | ★ | ★  | ★★★★★<br>★ |
| ATTAUABI<br>2020       | ★ | -- | ★ | ★ | -- | ★ | ★ | ★  | ★★★★★<br>★ |
| STRAATMIJE<br>R 2021   | ★ | -- | ★ | ★ | -- | ★ | ★ | ★  | ★★★★★<br>★ |
| PLEVRIS 2020           | ★ | -- | ★ | ★ | -- | ★ | ★ | ★  | ★★★★★<br>★ |
| BAR-GIL<br>SHIRIT 2020 | ★ | -- | ★ | ★ | -- | ★ | ★ | ★  | ★★★★★<br>★ |
| TURSI 2021             | ★ | -- | ★ | ★ | -- | ★ | ★ | ★  | ★★★★★<br>★ |
| MIYAZAKI<br>2019       | ★ | -- | ★ | ★ | -- | ★ | ★ | -- | ★★★★★      |
| BACAKSIZ<br>2019       | ★ | -- | ★ | ★ | -- | ★ | ★ | ★  | ★★★★★<br>★ |
| MARQUES-<br>CAMI 2020  | ★ | -- | ★ | ★ | -- | ★ | ★ | -- | ★★★★★      |
| MANLAY<br>2021         | ★ | -- | ★ | ★ | -- | ★ | ★ | ★  | ★★★★★<br>★ |
| YOKOYAMA<br>2021       | ★ | -- | ★ | ★ | -- | ★ | ★ | ★  | ★★★★★<br>★ |
| CHAPUIS-<br>BIRON 2019 | ★ | -- | ★ | ★ | -- | ★ | ★ | ★  | ★★★★★<br>★ |
| TAKEUCHI<br>2020       | ★ | -- | ★ | ★ | -- | ★ | ★ | ★  | ★★★★★<br>★ |

**Supplementary Table 4. Quality Assessment performed using the Grading of Recommendations Assessment, Development and Evaluation (GRADE) framework**

**USTEKINUMAB COMPARED TO PLACEBO FOR THE TREATMENT OF PERIANAL FISTULAS AT 8 WEEKS**

| OUTCOMES                     | Study event rates, n (%) |                          | Relative effect,<br>RR (95% CI) | No. of<br>participants<br>(Studies) | Quality of the<br>evidence (GRADE)                          |
|------------------------------|--------------------------|--------------------------|---------------------------------|-------------------------------------|-------------------------------------------------------------|
|                              | Risk<br>with<br>placebo  | Risk with<br>ustekinumab |                                 |                                     |                                                             |
| <b>FISTULA<br/>HEALING</b>   | 12/71                    | 39/150                   | 1.53 (0.85 to<br>2.75)          | 1306 (3<br>studies)                 | LOW<br>(due to<br>indirectness (-1)<br>and imprecision(-1)) |
| <b>FISTULA<br/>REMISSION</b> | 10/71                    | 37/150                   | 1.75 (0.95 to<br>3.31)          | 1306 (3<br>studies)                 | LOW                                                         |

(due to  
indirectness (-1)  
and imprecision (-1))

**USTEKINUMAB COMPARED TO PLACEBO FOR THE TREATMENT OF PERIANAL FISTULAS AT 22 WEEKS**

| OUTCOMES               | Study event rates, n (%) |                       | Relative effect, RR (95% CI) | No. of participants (Studies) | Quality of the evidence (GRADE)                                     |
|------------------------|--------------------------|-----------------------|------------------------------|-------------------------------|---------------------------------------------------------------------|
|                        | Risk with placebo        | Risk with ustekinumab |                              |                               |                                                                     |
| <b>FISTULA HEALING</b> | 6/20                     | 9/19                  | 1.57 (0.69 to 3.58)          | 39 (1 study)                  | VERY LOW<br>(due to indirectness (-1) and serious imprecision (-2)) |

|
